# Supplementary material for: Evaluating the 11-year solar cycle and short-term 10 Be deposition events with novel excess water samples from the EGRIP project
Source: Copernicus journal article supplement (doi:10.5194/cp-2022-94), 2022-12-19
Supplement: Supplementary file 1 [file cp-2022-94-supplement.pdf]

## Supplementary figures

### **Evaluating the 11-year solar cycle and short-term<sup>10</sup>Be deposition events with novel excess water samples from the EGRIP project**

Chiara I. Paleari<sup>1</sup>, Florian Mekhaldi<sup>1,2</sup>, Tobias Erhardt<sup>3,4</sup>, Minjie Zheng<sup>1,5</sup>, Marcus Christl<sup>6</sup>, Florian Adolphi<sup>4,7</sup>, Maria Hörhold<sup>4</sup>, Raimund Muscheler<sup>1</sup>

<sup>1</sup>Department of Geology, Lund University, Lund, Sweden

<sup>2</sup>British Antarctic Survey, Ice Dynamics and Paleoclimate, Cambridge, UK

<sup>3</sup>Climate and Environmental Physics, Physics Institute and Oeschger Center for Climate Change Research, University of Bern, Bern, Switzerland

<sup>4</sup>Alfred Wegener Institute, Helmholtz Centre for Polar and Marine Research, Bremerhaven, Germany

<sup>5</sup>Institute for Atmospheric and Climate Science, ETH Zürich, Zürich, Switzerland

<sup>6</sup>Laboratory of Ion Beam Physics, ETH Zürich, Zürich, Switzerland

<sup>7</sup>Dept. of Geosciences, Bremen University, Bremen, Germany

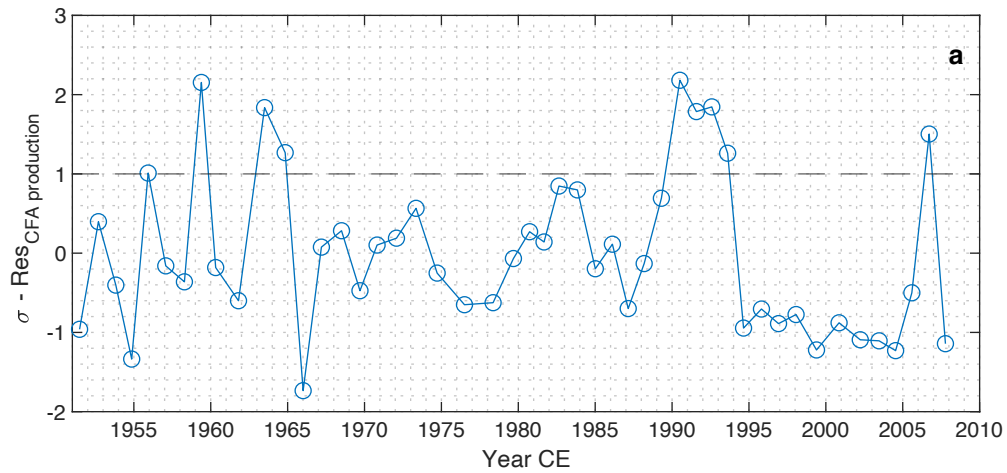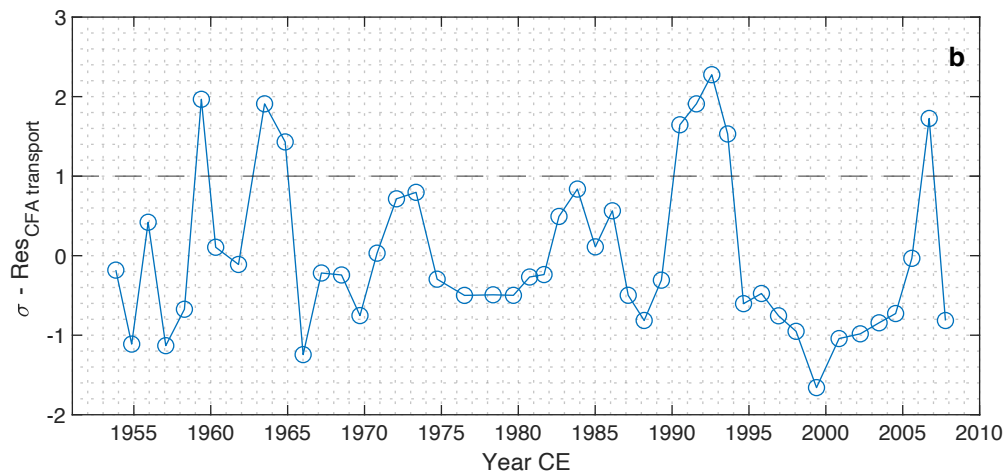

S1. Standard scores for the EGRIP S6  $^{10}\text{Be}$  record from CFA samples. Panel a shows the standardized residuals obtained by subtracting the normalized theoretical  $^{10}\text{Be}$  global production rate from the normalized  $^{10}\text{Be}$  record since 1951. Panel b shows the same, but for the  $^{10}\text{Be}$  fluxes including the transport in the Northern Hemisphere. The theoretical  $^{10}\text{Be}$  global production rate record is from (Mekhaldi et al., 2021).

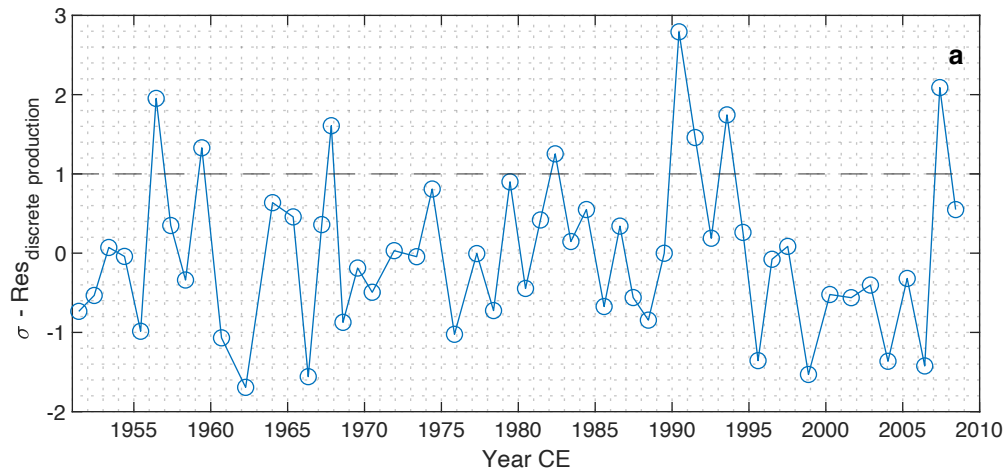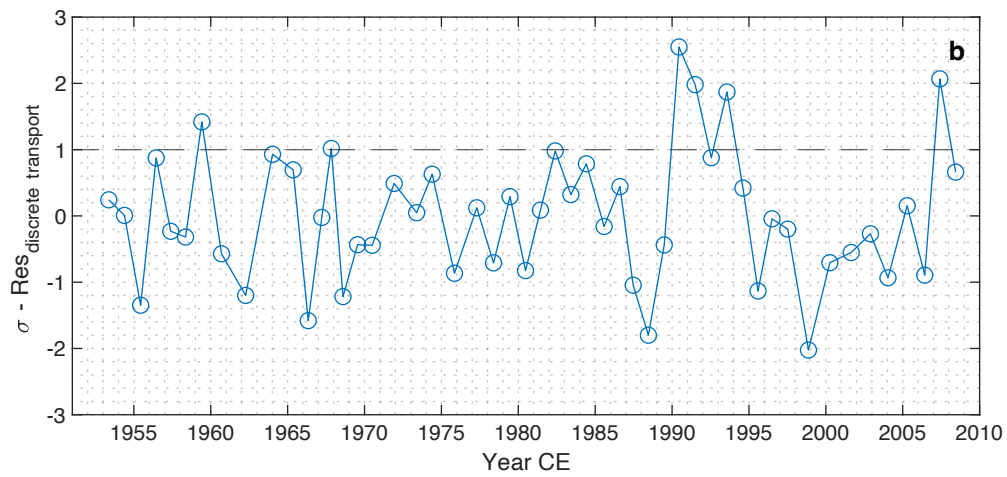

S2. Standard scores for the EGRIP S6  $^{10}\text{Be}$  record from discrete samples. Panel a shows the standardized residuals obtained by subtracting the normalized theoretical  $^{10}\text{Be}$  global production rate from the normalized  $^{10}\text{Be}$  record since 1951. Panel b shows the same, but for the  $^{10}\text{Be}$  fluxes including the transport in the Northern Hemisphere. The theoretical  $^{10}\text{Be}$  global production rate record is from (Mekhaldi et al., 2021).

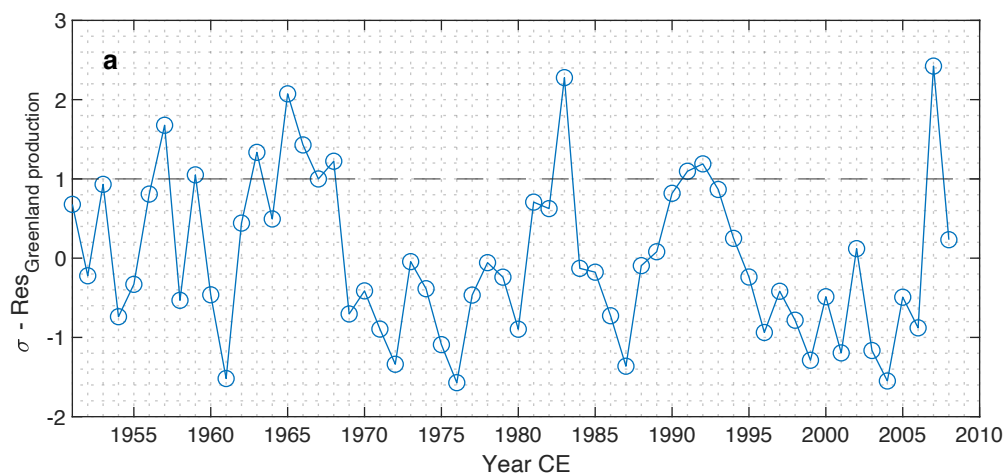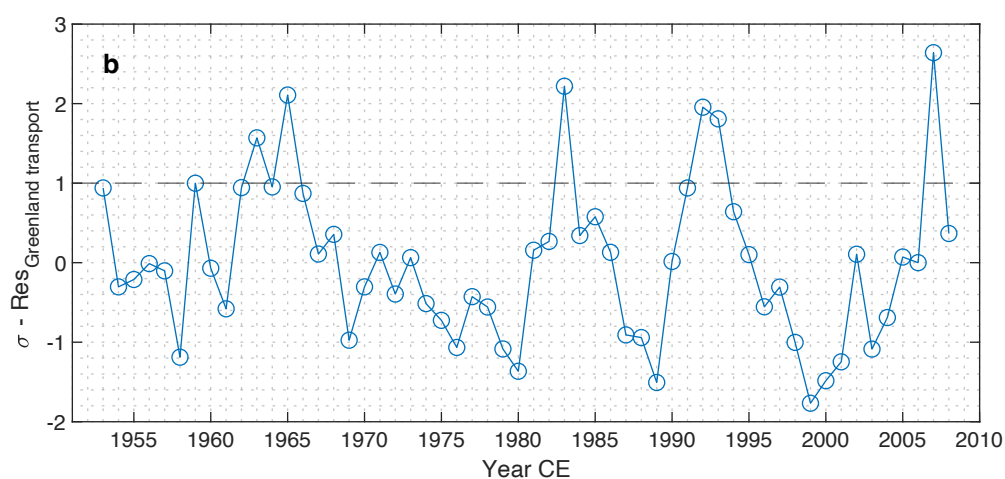

S3. Standard scores for the  $^{10}\text{Be}$  Greenland stack. Panel a shows the standardized residuals obtained by subtracting the normalized theoretical  $^{10}\text{Be}$  global production rate from the normalized  $^{10}\text{Be}$  record since 1951. Panel b shows the same, but for the  $^{10}\text{Be}$  fluxes including the transport in the Northern Hemisphere. The theoretical  $^{10}\text{Be}$  global production rate record is from (Mekhaldi et al., 2021).

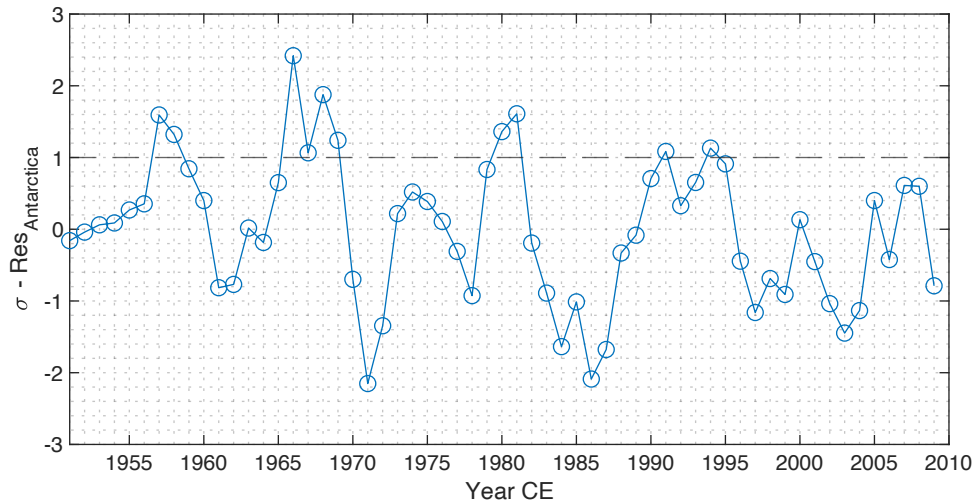

S4. Standard scores for the  $^{10}\text{Be}$  Antarctic stack. The standardized residuals were obtained by subtracting the normalized theoretical  $^{10}\text{Be}$  global production rate from the normalized  $^{10}\text{Be}$  record since 1951. The theoretical  $^{10}\text{Be}$  global production rate record is from (Mekhaldi et al., 2021).

## References

Mekhaldi, F., Adolphi, F., Herbst, K., and Muscheler, R.: The Signal of Solar Storms Embedded in Cosmogenic Radionuclides: Detectability and Uncertainties, *Journal Geophys. Res. Sp. Phys.*, 126, <https://doi.org/10.1029/2021ja029351>, 2021.
